# Supplementary material for: Shortwave radiative impacts of the Asian Tropopause Aerosol Layer (ATAL) using balloon-borne in situ measurements at three distinct locations in India
Source: Copernicus journal article supplement (doi:10.5194/acp-25-8255-2025), 2025-07-31
Supplement: Supplementary file 1 [file acp-25-8255-2025-supplement.zip]

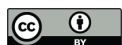

*Supplement of*

## **Shortwave radiative impacts of the Asian Tropopause Aerosol Layer (ATAL) using balloon-borne in situ measurements at three distinct locations in India**

**Vadassery Neelamana Santhosh et al.**

*Correspondence to:* Bomidi Lakshmi Madhavan ([madhavanbomidi@gmail.com](mailto:madhavanbomidi@gmail.com), [blmadhavan@narl.gov.in](mailto:blmadhavan@narl.gov.in))

- [acp-25-8255-2025-supplement-title-page.pdf](#)
- [Supplement.docx](#)

The copyright of individual parts of the supplement might differ from the article licence.
